# Supplementary material for: Methylation of RCAN1.4 mediated by DNMT1 and DNMT3b enhances hepatic stellate cell activation and liver fibrogenesis through Calcineurin/NFAT3 signaling
Source: PubMed Central journal article supplement — Theranostics. 2019 Jun 9;9(15):4308–23. doi: 10.7150/thno.32710 (PMC6599664; doi:10.7150/thno.32710), 2019-06-09

## **Supplementary Methods:**

### **Cell culture and treatment**

The HSC-T6 cell line was purchased from Shanghai FuMeng Gene Biotechnology corporation (Shanghai, China). HSC-T6 cells were cultured in Dulbecco's Modified Eagle's Medium (DMEM, Keygen, China) containing 5 % fetal bovine serum (FBS, Biological Industries, Israel) at 37 °C in a humidified atmosphere containing 5 % CO<sub>2</sub>.

### **Blood Measurements**

Blood samples collected from mice were used to measure alanine aminotransferase (ALT) and aspartate aminotransferase (AST). Blood samples were drawn from mice 4 weeks after with or without intraperitoneal injection of 10 % CCl<sub>4</sub>. Serum ALT and AST levels were measured by alanine aminotransferase/aminotransferase Assay Kits (Nanjing Jiancheng Bioengineering Institute) according to the manufacturer's instructions. The absorbance at 510 nm was obtained with a Multiskan MK3 (Biotek, USA).

### **Histopathology**

The middle portion of the left lobe of the liver of C57BL/6J mice was excised and then perfused in 4 % paraformaldehyde for 24-48 h. After fixation, the tissue was embedded in paraffin, and 5µm sections were stained with hematoxylin and eosin (H&E) for morphological analysis and sirius-red and Masson's trichrome staining for collagen expression by using the standard protocols. The stained tissues were scanned by Panoramic MIDI (3D HISTECH, Hungary) and viewed by CaseViewer slice software.

### **Oil-Red O staining**

Fresh liver tissues were immersed in freezing medium and stored at -80 °C. The liver tissues were sliced, washed with PBS three times (x5min) and stained with Oil Red O agent according to the manufacturer's protocol (Nanjing Jiancheng Bioengineering Institute, Nanjing, China).

### **Immunohistochemistry**

Immunohistochemistry (IHC) was performed on paraffin sections to examine the expression of  $\alpha$ -SMA, RCAN1, CD8, Ly6G, DNMT1, DNMT3a and DNMT3b using a microwave-based antigen retrieval technique. Sections were incubated with rabbit anti- $\alpha$ -SMA (1:50 dilution), anti-RCAN1 (1:200 dilution), anti-CD8 (1:50 dilution), anti-Ly6G (1:50 dilution), anti-DNMT1 (1:200 dilution), anti-DNMT3a (1:200 dilution), and anti-DNMT3b (1:200 dilution) for overnight at 4°C. After incubation with the secondary antibody and chromagen liquid DAB (3, 30-diaminobenzidine tetrahydrochloride), the slides were counterstained with hematoxylin. Non-immune rabbit IgG instead of the primary antibody was used as a negative control. The stained tissues were examined with an inverted fluorescence microscope (OLYMPUS IX83, Tokyo, Japan), or scanned by Panoramic MIDI (3D HISTECH, Hungary) and viewed by CaseViewer slice software. The characteristics of antibodies used are listed in **Table S1**

### **Immunofluorescence**

To determine the colocalization of  $\alpha$ -SMA and RCAN1 *in vivo*, double immunofluorescent staining was performed. Briefly, freshly dissected liver tissues were OCT-embedded, and the sections (10  $\mu$ m in thickness) were cut with a cryotome Cryostat (Leica, CM 1950, Germany). Frozen tissue sections were incubated with 10% BSA for one hour at room temperature to block

unspecific staining. After rinsing, the slides were treated with Cy3 (red)-conjugated anti- $\alpha$ -SMA antibody (1:50 dilution) in combination with FITC (green)-conjugated anti-RCAN1 (1:200 dilution) overnight at 4 °C. The stained sections were scanned by Panoramic MIDI (3D HISTECH, Hungary) and viewed by CaseViewer slice software.

HSC-T6 cells were fixed and permeabilized in 4 % paraformaldehyde, 0.2 % TritonX-100 in PBS for 10 min. Nonspecific binding was blocked with 10 % BSA for 1 h at RT. Subsequently, the cells were incubated with primary antibodies for RCAN1 (1:200 dilution),  $\alpha$ -SMA (1:50 dilution), DNMT1 (1:200 dilution), DNMT3a (1:200 dilution), and DNMT3b (1:200 dilution) overnight at 4 °C. Sections were washed twice with PBS and incubated with fluorescein-labeled secondary antibody at a dilution of 1:50 for 1.5 h at RT in the dark. Slides were mounted in mounting media with DAPI for 5 min at RT. After washing twice with PBS, the slides were covered with DABCO and the stained tissues were examined with an inverted fluorescence microscope (OLYMPUS IX83, Tokyo, Japan). The characteristics of antibodies are listed in **Table S1**.

### **TUNEL Staining**

To visualize apoptotic bodies, liver tissue sections were fixed in 10 % buffered formalin at room temperature for 25 min and then washed with PBS containing 0.2 % Triton X-100 at room temperature. Subsequently, the sections were covered with 100  $\mu$ L equilibration buffer for 10 min and rTdT reaction was added. The reaction was terminated using saline-sodium citrate. Next, liver tissue sections were immersed in 0.3 % H<sub>2</sub>O<sub>2</sub> for 3-5 min, washed three times with PBS, immersed in 50  $\mu$ L TUNEL (terminal deoxynucleotidyl transferase-mediated dUTP nick end labeling) detection solution at 15–25 °C for 1 h. Finally, slides were incubated with DAPI (Bi

Yuntian Biological Technology, China) for 10 min and scanned by Panoramic MIDI (3D HISTECH, Hungary) and viewed by CaseViewer slice software.

### **Western blot analysis**

Total Proteins from cultured HSC-T6 cells and primary hepatic stellate cells were extracted with RIPA lysis buffer (contained 1 % PMSF) (Beyotime, China). Nuclear proteins and cytoplasmic proteins were extracted using CellLytic™ NuCLEAR™ Extraction Kit (BestBio, Shanghai, China) according to the manufacturer's instructions. The concentration of protein was determined by the BCA protein assay kit (Beyotime, Jiangsu, China). Proteins of each sample 30–50 µg were separated by SDS-PAGE gel (10 % or 12 %) and then transferred onto PVDF membranes (Millipore Corp, Billerica, MA, USA). The membranes were blocked in 5 % skim milk for 3 h to block nonspecific binding. Subsequently, membranes were incubated with the primary antibodies against RCAN1, COL1a1,  $\alpha$ -SMA,  $\beta$ -actin, C-myc, Cyclin D1, Bax, Bcl2, cleaved-caspase3, DNMT1, DNMT3a, DNMT3b, calcineurin (CaN), NFAT1, NFAT2, NFAT3, and NFAT4 overnight at 4 °C, followed by incubation with secondary antibody at room temperature for 1 h. Signals were captured with BioshineChemiQ image system. The intensities of Western blotting bands were quantified and analyzed by using the Image J software (NIH, Bethesda, MD, USA). The characteristics of antibodies are listed in **Table S1**.

### **RNA extraction and RT-qPCR analysis**

Total RNA was extracted from primary HSCs isolated from a fibrotic mouse model and cultured HSC-T6 cells using TRIzol (Invitrogen, USA) according to the manufacturer's instructions. The total RNA was uniformly quantified to 1000 ng/µl by the Thermo Scientific

NanoDrop 2000 Spectrophotometer (Thermo Scientific, USA). Single-stranded cDNA was synthesized from total RNA using the PrimeScript<sup>®</sup> RT reagent kit (Takara, JAP) according to the manufacturer's instructions. SYBR-Green real-time quantitative PCR (RT-q-PCR) analysis was performed for RCAN1.1, RCAN1.4,  $\alpha$ -SMA, Colla1, GAPDH and  $\beta$ -actin mRNAs by using QuantiNova SYBR Green PCR Kit (Takara, Japan) and the Pikoreal 96 real-time PCR system (Thermo Scientific, USA). The ratio for the mRNA of interest index was normalized to GAPDH (in mice) or  $\beta$ -actin (in rat) and expressed as the mean  $\pm$  s.e.m. The sequences of primers used for RT-qPCR are listed in **Table S2**.

#### **Transfection of RCAN1.4 and NFAT3 overexpression plasmid constructs and RCAN1.4 small hairpin RNA into HSC-T6 cells**

Overexpression or knock-down of RCAN1.4 and knock-in of NFAT3 were assessed by Western blotting and RT-qPCR analysis after transfection of HSC-T6 cells with rat-derived RCAN1.4 and NFAT3 overexpression plasmids or RCAN1.4 shRNA,. All shRNAs and plasmid constructs were obtained from GenePharma Co., Ltd. Cells ( $3 \times 10^5$ /mL) were seeded in 6-well plates and transfected with the RCAN1.4 plasmid or shRNA and control constructs mixed with Lipo2000 transfection reagent (Invitrogen, Carlsbad, CA, USA) according to the manufacturer's protocol. Cells were incubated with Opti-MEM at 37 °C and 5 % CO<sub>2</sub> for 6 h. Subsequently, cells were cultured in DMEM containing 5 % FBS. The RCAN1.4 overexpressing or knockdown cells were treated with TGF- $\beta$ 1 (10 ng/mL) for 24h and then harvested for Western blotting, RT-qPCR or other analyses.

#### **RNA interference (RNAi) analysis**

For DNMT1, DNMT3a, and DNMT3b silencing, HSC-T6 cells were transfected with corresponding siRNAs (GenaPharma, China). The culture medium was replaced by DMEM containing 5 % FBS and TGF- $\beta$ 1 (10 ng/mL) was added 6 h after transfection. The following siRNA sequences were used: DNMT1-siRNA (sense: 5'-CCCAGAGUAUGCACCAAUATT-3' and antisense: 5'-UAUUGGUGCAUACUCUGGGTT-3'); DNMT3a-siRNA (sense: 5'-GCGUCACACAGAAGCAUAUTT-3' and antisense: 5'-AUAUGC UUCUGUGUGACGCTT-3'); DNMT3b-siRNA (sense: 5'-AGAUGACAGGUGCCCAGAGUU-3' and antisense: 5'-CUCUGGGCACCUGUCAUGUUU-3'); siRNA-control with scrambled sequence: (sense: 5'-UUCUCCGAACGUGUCACGUTT-3' and anti-sense: 5'-ACGUGACACGUUCGGAGAATT-3').

### **Scratch wound healing assay**

Parallel were drawn behind a 6-well plate at a distance interval of 0.5-1 cm. RCAN1.4-RNAi transfection experiment was performed as previously described in this part. When the cells were about 90 % confluent, scratches perpendicular to the parallel were made using a spearhead. Following 12 h of culture, the images of cell motility close to the scratches were captured using Zeiss inverted microscope Primovert (Carl Zeiss, Jena, Germany). Cell migration ability was reflected by the width of scratch. Each experiment was repeated at least three times.

### **Transwell assay**

Transwell chamber system (Costar 3422, Corning, USA) was used to investigate the effects of RCAN1.4 silencing on cell migration.  $2 \times 10^5$  RCAN1.4-RNAi-transfected cells in serum-free DMEM were added to each upper inset pre-coated with 8.0  $\mu$ m Pore Polycarbonate Membrane. DMEM containing 5 % FBS was added to the lower chamber. After 24 h of culture, the non-

invading cells were removed and stained with crystal violet. Finally, the images were captured using Zeiss inverted microscope Primovert (Carl Zeiss, Jena, Germany).

### **String database analysis**

The protein interactions with RCAN1 were predicted by the online String database (Search Tool for the Retrieval of Interacting Genes, <http://string-db.org/>).

### **Cell cycle analysis**

After 24 h of transfection, cells were trypsinized and washed three times with cold PBS, then fixed in 70 % ethanol in PBS at 4 °C overnight. Subsequently, cells were washed three times with cold PBS and incubated with propidium iodide (PI) staining buffer at 37 °C for 30 min in the dark. The cell cycle was analyzed on BD FACS Verse (BD Biosciences) and cell populations were quantified by the ModFit data analysis software package (Verity Software House, USA). All experiments were performed in triplicate and repeated at least three times.

### **Cell apoptosis analysis**

The number of apoptotic and necrotic cells was detected by flow cytometry. Transfected HSC-T6 cells were cultured with TGF- $\beta$ 1 (10 ng/mL) for 24h, digested with trypsin, and centrifuged at 1500 r.p.m. for 5 min. Subsequently, 400  $\mu$ L Annexin V binding fluid was added to about  $10^6$  cells /mL and the cells were stained with 5  $\mu$ L FITC for 15 min at 4 °C in the dark. Cells were re-stained with 10  $\mu$ L PI for 5 min, placed at 4 °C in the dark and measured with a laser eight-color flow cytometer (FACSVerse, BD, USA). The results were quantified using the FlowJo 7.6 software.

### Cell proliferation analysis

The proliferation of HSC-T6 cells was determined by Cell Counting Kit-8 (CCK-8) assay. 100  $\mu$ L HSC-T6 cells were seeded in 96-well culture plates at a density of  $5 \times 10^3$  per well, and the edge wells were filled with sterile PBS. After attachment, HSC-T6 cells were transfected with GV230-Control or GV230-RCAN1.4 plasmid or RCAN1.4-RNAi or scrambled-RNAi for 6h in Opti-MEM and cultured in DMEM containing 5 % FBS (Biological Industries, Israel). HSC-T6 cells in the model and transfected groups were cultured with TGF- $\beta$ 1 (10 ng/mL) for 24 h. Subsequently, 10  $\mu$ L CCK-8 solution (Sigma, USA) was added to 6-well culture plates for 4 h. The value of absorbance (A) was measured at 490 nm. Cell viability = the A value of experimental group wells/the A value of blank group wells \* 100%. All experiments were performed in triplicate and repeated at least three times.

### Supplementary Figure Legends:

**Figure S1. Liver fibrosis mouse model was established in C57BL/6j mice.** (A) Gross pathology of liver tissues from the vehicle and CCl<sub>4</sub>-stimulated groups. Representative pictures of (B) H&E, (C) Masson and Sirius-Red, (D) Oil-red O, (E)  $\alpha$ -SMA, (F) CD8, (G) Ly6G, (H) TUNEL staining and (J) Desmin staining of liver tissue sections were shown. (I) Serum ALT and AST levels. Values represent the mean  $\pm$ s.e.m. \*\*\*  $p < 0.001$  compared to Vehicle group.

**Figure S2.** (A) The  $\alpha$ -SMA protein expression was detected by immunofluorescence. Representative picture (Original magnification was 400 $\times$ ).

**Figure S3.** (A) Macroscopic examination of fresh liver tissues without fixation by an inverted



fluorescence microscope. **(B)** Representative CD8, Ly6G, and TUNEL staining (Original magnification is indicated). **(C)** The proteins that interact with RCAN1.4 were predicted by online String database.

**Figure S4.** The mRNA levels of vimentin, S100A4, and fibronectin were examined. \*\*\*  $p < 0.001$  as indicated.

**Figure S5. (A)** The efficiency of RCAN1.4-RNAi transfection was determined by RT-qPCR analysis. The influence of RCAN1.4 knock-down on HSC-T6 cell migration was assessed by **(B)** scratch wound healing assay and **(C)** Transwell experiment. Original magnification is indicated.

**Figure S6. (A)** The cytoplasmic proteins were extracted 24 h after GV230-RCAN1.4 plasmid or RCAN1.4-RNAi were transfected in activated HSC-T6 cells. The protein levels of NFAT1, NFAT2, NFAT3, and NFAT4 were detected by Western blotting analysis. Representative images of three independent experiments are shown. **(B)** Total proteins were isolated 24 h after GV230-RCAN1.4 plasmid or RCAN1.4-RNAi transfection in activated HSC-T6 cells. The protein level of NFAT3 was determined by Western blotting analysis. **(C)** The protein levels of CaN, NFAT1, NFAT2, NFAT3, and NFAT4 in liver fibrosis tissue were detected by Western blotting analysis. <sup>##</sup> $p < 0.01$ , <sup>\$</sup> $p < 0.05$ , <sup>\*\*</sup> $P < 0.01$ , as indicated. **(D)** The transfection efficiency of NFAT3 plasmid was detected by Western blotting analysis, <sup>\*</sup> $p < 0.05$  as indicated. **(E)** The protein levels of NFAT3, COL1a1, and  $\alpha$ -SMA in the GV114-NFAT3 transfected group was examined by Western blotting analysis, <sup>\*</sup> $p < 0.05$ , <sup>#</sup> $P < 0.05$ , as indicated. **(F)** Expression of COL1a1 and  $\alpha$ -SMA, <sup>\*</sup> $p < 0.05$ , <sup>#</sup> $P < 0.05$ , as indicated. For all panels, data represent the mean  $\pm$  s.e.m. for 3–4 independent

experiments.

**Figure S7. (A)** Protein levels of DNMT1, DNMT3a, and DNMT3b were determined by immunohistochemistry staining *in vivo* and immuno-fluorescence analysis *in vitro*. Representative views from each group are presented. **(B)** The mRNA expression of RCAN1.4 in DNMT1-RNAi-, DNMT3a-RNAi-, DNMT3b-RNAi-, and scrambled-RNAi transfected groups was measured by RT-qPCR analysis. <sup>##</sup> $p < 0.01$  as indicated. Values represent the mean  $\pm$ s.e.m.

**Table S1.** The characteristics of antibodies

| Protein       | Application | Origin                                   | Dilution          |
|---------------|-------------|------------------------------------------|-------------------|
| RCAN1         | WB&IHC&IF   | D6694, Sigma-Aldrich, USA                | 1:800&1:200&1:200 |
| COL1a1        | WB          | bs10423R, Bioss, China                   | 1:300             |
| $\alpha$ -SMA | WB&IHC&IF   | bs0189R, Bioss, China                    | 1:300&1:50&1:50   |
| DNMT1         | WB&IHC&IF   | ab13537, Abcam, UK                       | 1:800&1:200&1:200 |
| DNMT3a        | WB&IHC&IF   | ab13888, Abcam, UK                       | 1:800&1:200&1:200 |
| DNMT3b        | WB&IHC&IF   | ab2851, Abcam, UK                        | 1:800&1:200&1:200 |
| C-myc         | WB          | D3N8F, Cell Signaling Technology, USA    | 1:800             |
| CyclinD1      | WB          | 92G2, Cell Signaling Technology, USA     | 1:800             |
| Bax           | WB          | 2772s, Cell Signaling Technology, USA    | 1:800             |
| Bcl2          | WB          | ab194583, Cell Signaling Technology, USA | 1:800             |
| Caspase3      | WB          | 9662, Cell Signaling Technology, USA     | 1:800             |
| CaN           | WB          | ab52761, Abcam, UK                       | 1:800             |
| NFAT1         | WB          | ab2722, Abcam, UK                        | 1:800             |

|        |     |                            |       |
|--------|-----|----------------------------|-------|
| NFAT2  | WB  | ab2796, Abcam, UK          | 1:800 |
| NFAT3  | WB  | bs6461R, Bioss, China      | 1:300 |
| NFAT4  | WB  | bs2952, Bioss, China       | 1:300 |
| CD8    | IHC | GB11068, Servicebio, China | 1:500 |
| Ly6G   | IHC | GB11229, Servicebio, China | 1:500 |
| Desmin | IHC | GB12081, Servicebio, China | 1:800 |

**Table S2.** The sequence of primers used for RT-qPCR

| Gene (species) | Forward                      | Reverse                      |
|----------------|------------------------------|------------------------------|
| <b>Rat</b>     |                              |                              |
| RCAN1.1        | 5'-AGAAGTACG AGCCAC ACGCA-3' | 5'-TTCCTCCTCCTCCTCTTGGT-3'   |
| RCAN1.4        | 5'-AAGGCCTCCTCTCCTTGTTTC-3'  | 5'-GTGTGATTGCCACAC ACTCA-3'  |
| Colla1         | 5'-GATCCTGCCGATGTCGCTAT-3'   | 5'-TGTAGGCTACGCTGTTCTTGCA-3' |
| $\alpha$ -SMA  | 5'-CGAAGCGCAGAGCAAGAGA-3'    | 5'-CATGTCGTCCTCAGTTGGTGAT-3' |
| Vimentatin     | 5'-ACCCTGCAGTCATTCAGACA-3'   | 5'-CTGCAGCTCCTGGATCTCTT-3'   |
| Fibronectin    | 5'-AATGGTGACAGTTGGTTGCC-3'   | 5'-CATTGCATCGTGGTTGGCTA-3'   |
| S100A4         | 5'-GCTGCATTCCAGAAGCTGAT-3'   | 5'-CATCATGGCAATGCAGGACA-3'   |
| $\beta$ -actin | 5'-CCCATCTATGAGGGTTACGC-3'   | 5'-TTTAATGTCACGCACGATTTC -3' |
| <b>Mouse</b>   |                              |                              |
| RCAN1.1        | 5'-GATGGAGGAGGTGGA TCT GC-3' | 5'-ATTCAAATTTGGCCCGGCAC-3'   |
| RCAN1.4        | 5'-CGG TCTCCGTTGTTTCCT TC-3' | 5'-CCTCTGCCCTCTACT TCCAC-3'  |
| Colla1         | 5'-TGTAAACTCCCTCCACCCCA-3'   | 5'-TCGTCTGTTTCCAGGGTTGG-3'   |
| $\alpha$ -SMA  | 5'-CGGGCTTTGCTGGTGATG-3'     | 5'-CCCTCGATGGATGGGAAA-3'     |
| GAPDH          | 5'-GGACCTCATGGCCTACATGG-3'   | 5'-TAGGGCC TCTCTTGCTCAGT-3'  |

Figure S1

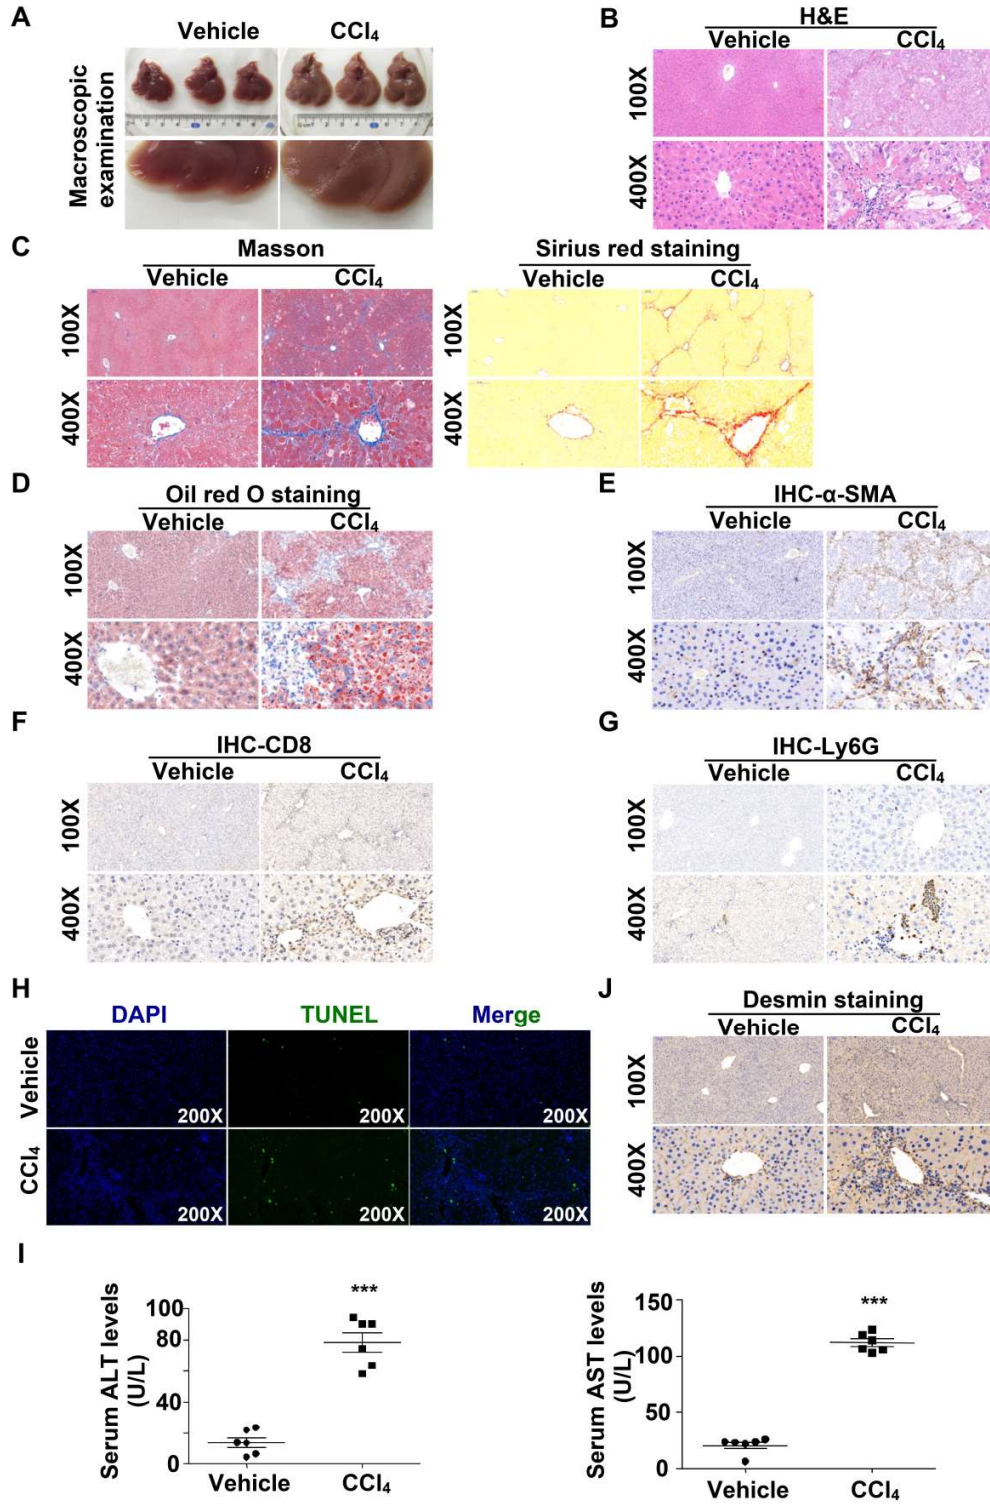

Figure S2

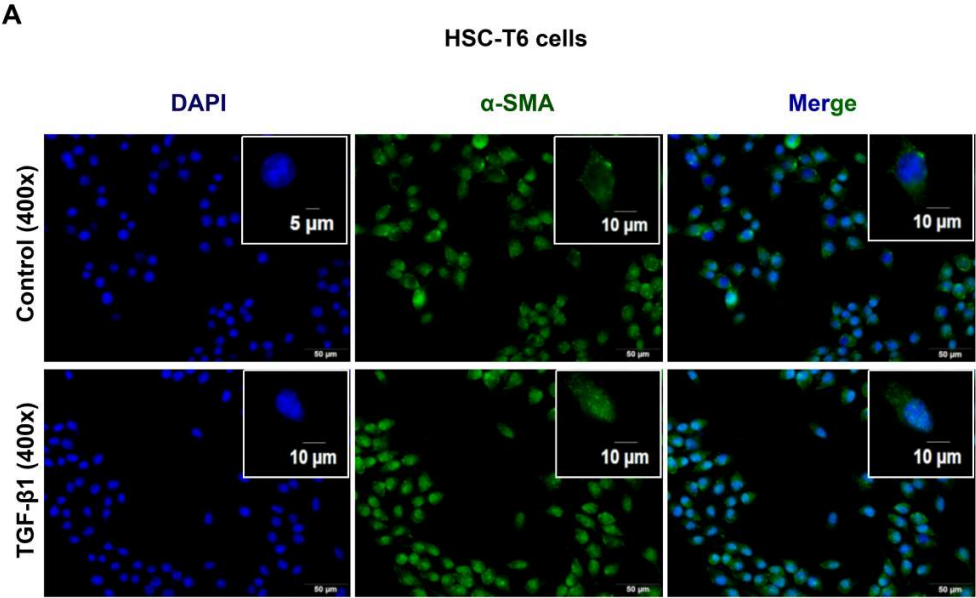

Figure S3

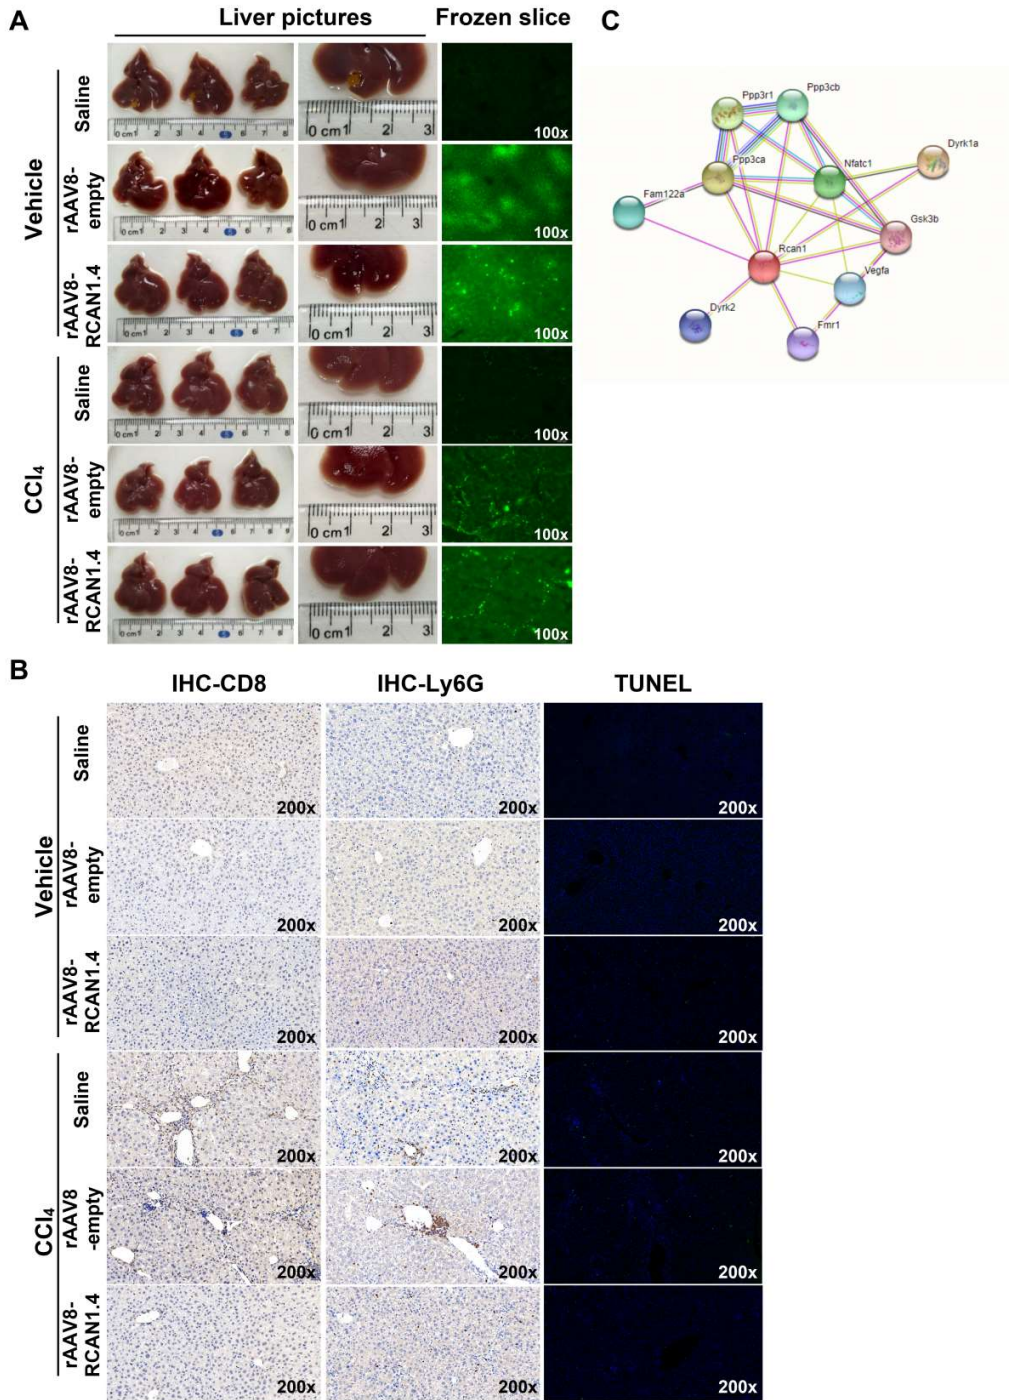

Figure S4

A

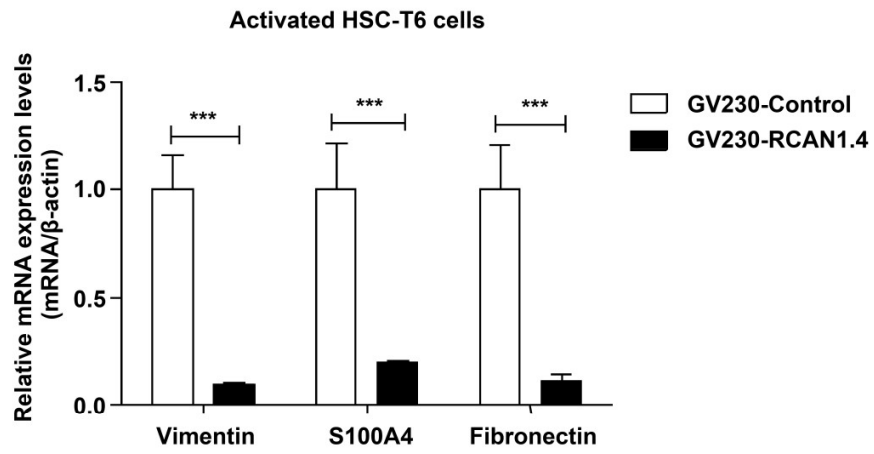



Figure S5

A

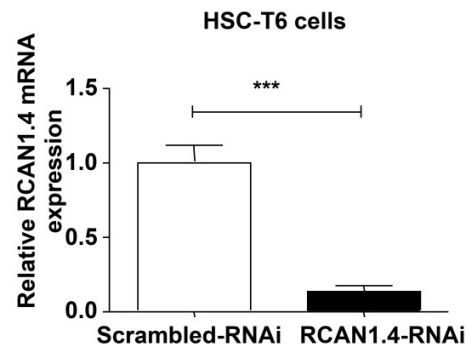

B

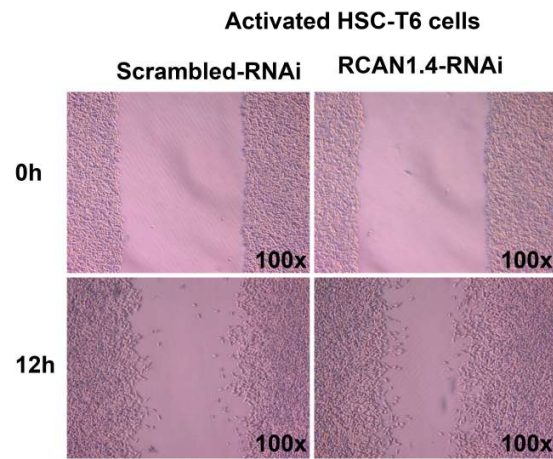

C

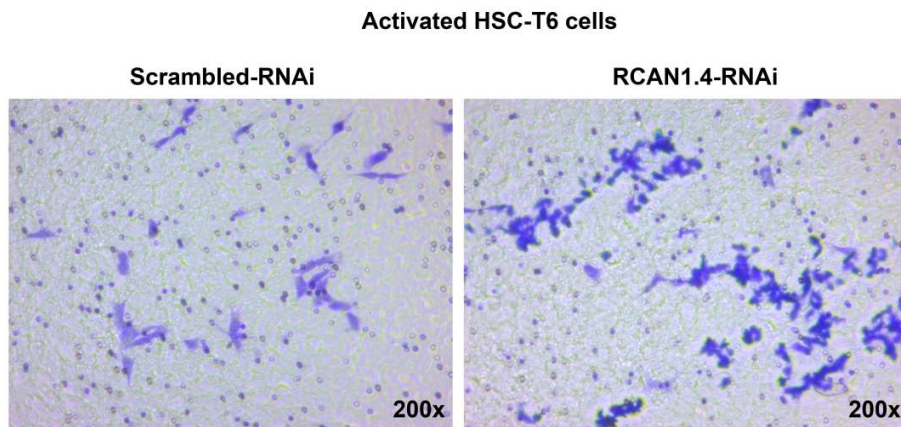



Figure S6-1

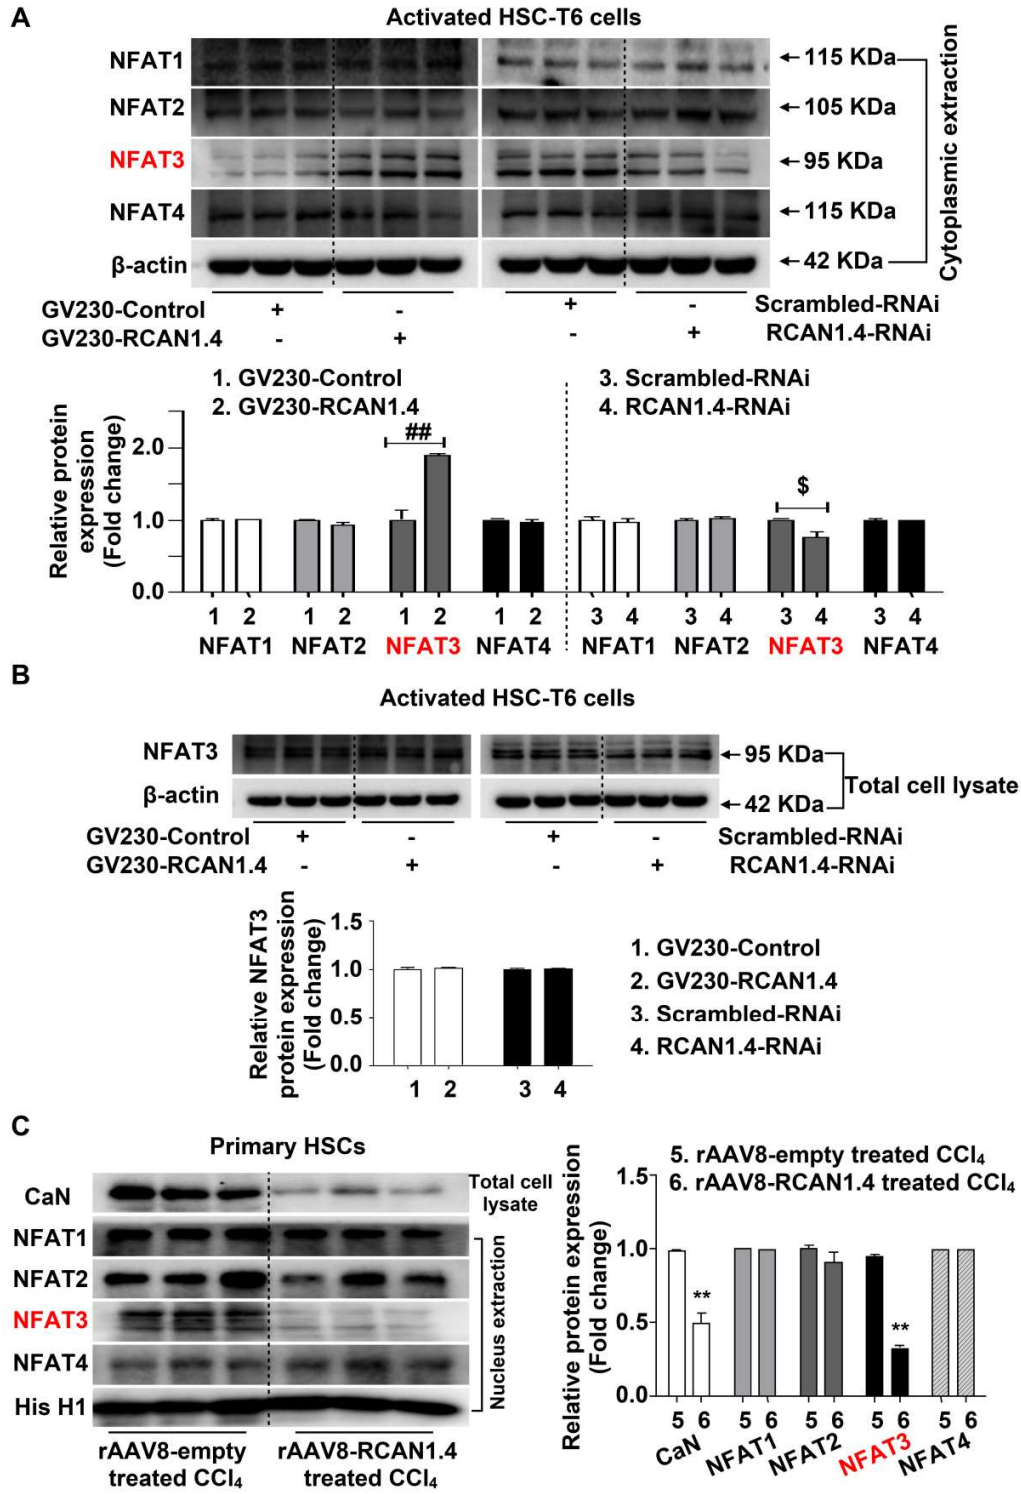

Figure S6-2

D

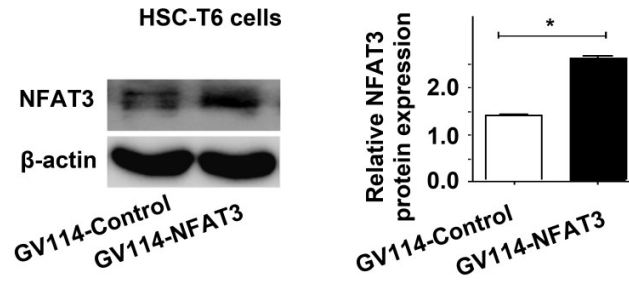

E

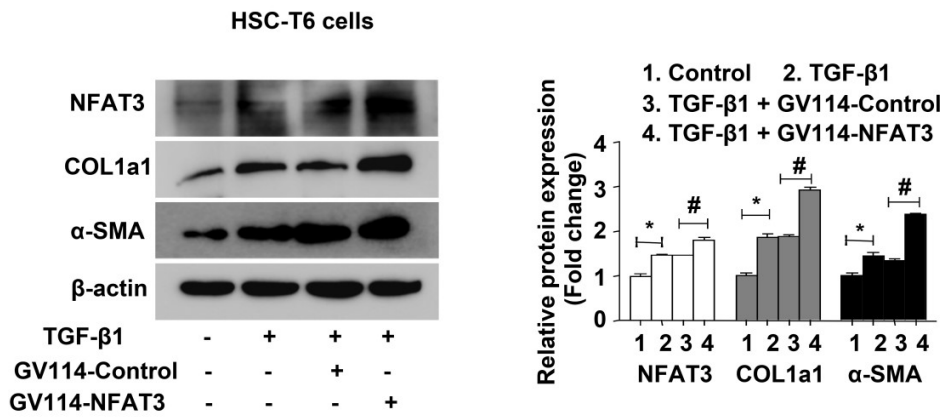

F

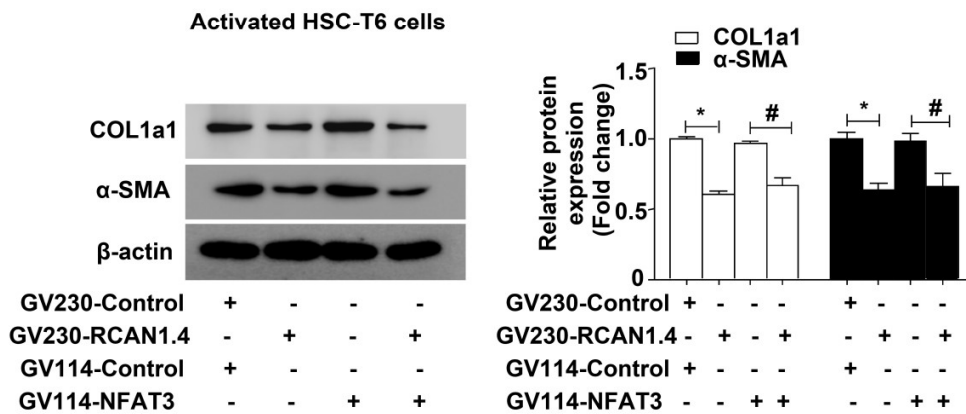

Figure S7-1

A

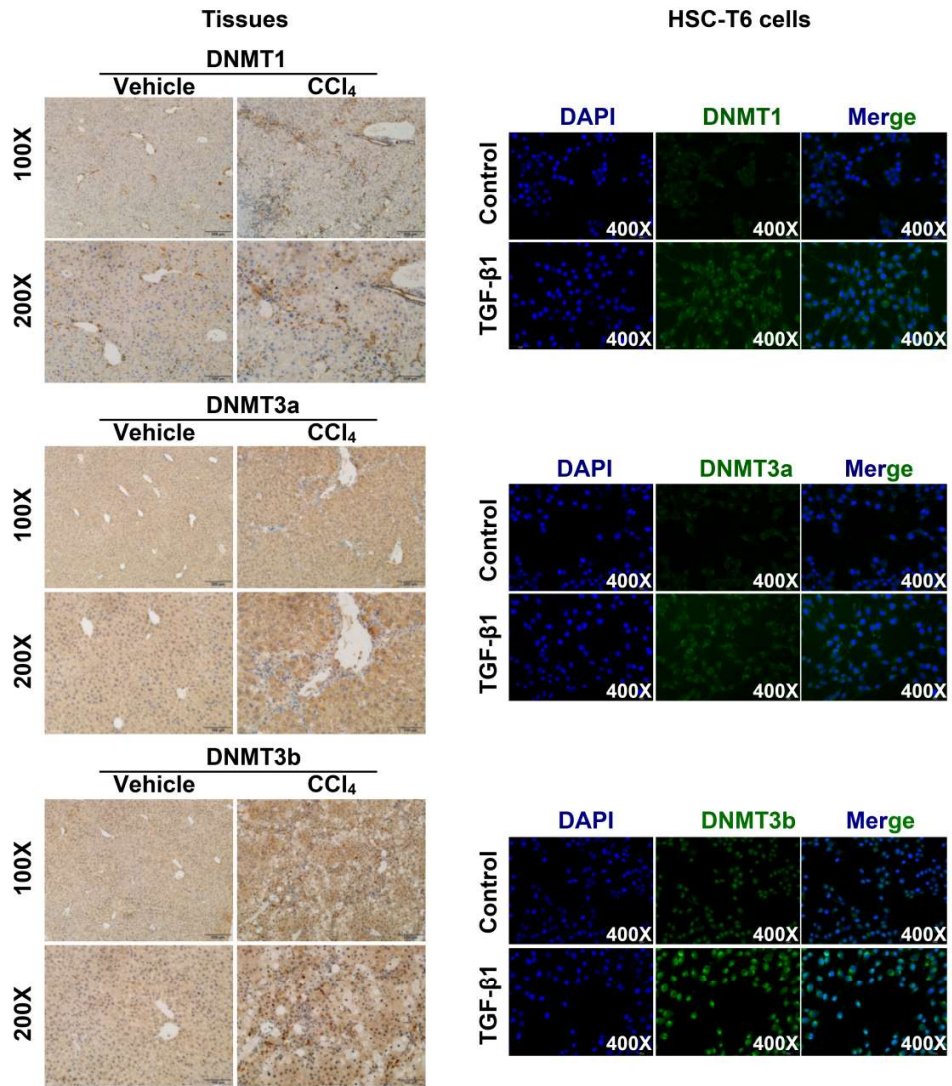

Figure S7-2

**B**

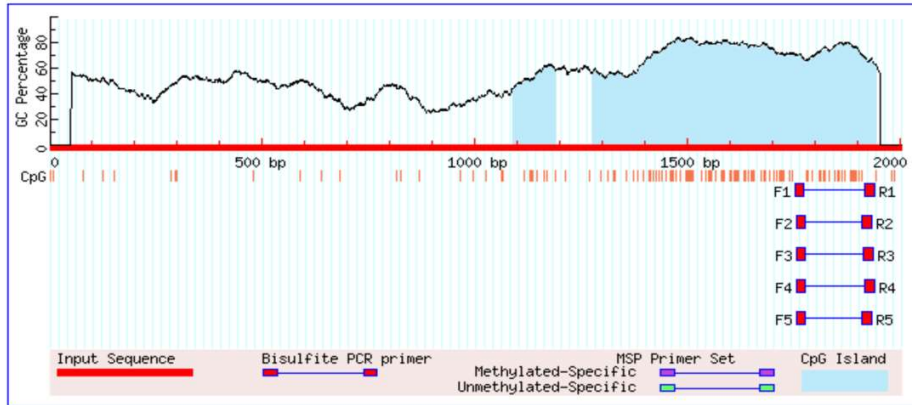

Sequence Name: NC\_000082.6:c92467669-92465669 Mus musculus strain C57BL/6J chromosome 16, GRCm38.p4 C57BL/6J  
Sequence Length: 2001

CpG island prediction results  
(Criteria used: Island size > 100, GC Percent > 50.0, Obs/Exp > 0.6)  
2 CpG island(s) were found in your sequence

| Island   | Size   | (Start - End) |
|----------|--------|---------------|
| Island 1 | 101 bp | (1089 - 1189) |
| Island 2 | 667 bp | (1277 - 1943) |

**C**

Activated HSC-T6 cells

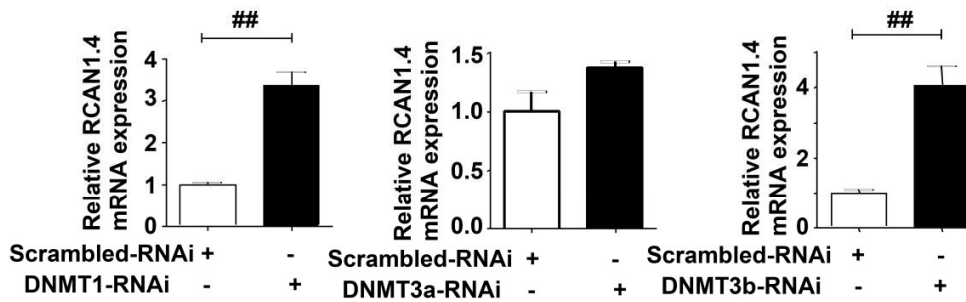

Supplement: thnov09p4308s1.pdf [file thnov09p4308s1.pdf]
